# Supplementary material for: Isotopic compositions of atmospheric total gaseous mercury in ten Chinese cities and implications for land surface emissions
Source: Copernicus journal article supplement (doi:10.5194/acp-2020-981), 2021-01-07
Supplement: Supplementary file 1 [file acp-2020-981-supplement.pdf]

Supporting information

**Isotopic compositions of atmospheric total gaseous mercury in ten Chinese cities and implications for land surface emissions**

Xuewu Fu<sup>1,2</sup>, Chen Liu<sup>1,3</sup>, Hui Zhang<sup>1,3</sup>, Yue Xu<sup>1</sup>, Hui Zhang<sup>1</sup>, Jun Li<sup>4</sup>, Xiaopu Lyu<sup>5</sup>, Gan Zhang<sup>4</sup>,  
Hai Guo<sup>5</sup>, Xun Wang<sup>1</sup>, Leiming Zhang<sup>6</sup>, Xinbin Feng<sup>1,2,3</sup>

<sup>1</sup>State Key Laboratory of Environmental Geochemistry, Institute of Geochemistry, Chinese Academy of Sciences,  
Guiyang, 550081, China

<sup>2</sup>CAS Center for Excellence in Quaternary Science and Global Change, Xi'an, 710061, China

<sup>3</sup>University of Chinese Academy of Sciences, Beijing, 100049, China

<sup>4</sup>State Key Laboratory of Organic Geochemistry, Guangzhou Institute of Geochemistry, Chinese Academy of  
Sciences, Guangzhou, 510640, China

<sup>5</sup>Department of Civil and Environmental Engineering, The Hong Kong Polytechnic University, Hong Kong, China

<sup>6</sup>Air Quality Research Division, Science and Technology Branch, Environment and Climate Change Canada,  
Toronto, Ontario, Canada

|                |          |                |          |
|----------------|----------|----------------|----------|
| Figure S1..... | Page S1  | Figure S2..... | Page S2  |
| Figure S3..... | Page S3  | Figure S4..... | Page S4  |
| Figure S5..... | Page S5  | Figure S6..... | Page S6  |
| Figure S7..... | Page S7  | Figure S8..... | Page S8  |
| Table S1.....  | Page S9  | Table S2.....  | Page S10 |
| Table S3.....  | Page S11 | Table S4.....  | Page S12 |
| Table S5.....  | Page S17 | Table S6.....  | Page S19 |
| Reference..... | Page S19 |                |          |

**Number of pages: 18**

**Number of figures: 7**

**Number of Tables: 6**

Figure S1 Locations of the ten urban and one rural sites (black dot) in China investigated in the present study and the gridded surface  $\text{Hg}^0$  emission inventory in China in 2013 simulated by Wang et al.(2016). Black square surrounding each sampling site represent the domain of  $1^\circ \times 1^\circ$  in size that was used to extract the regional soil emission fluxes for the sampling site in the present study.

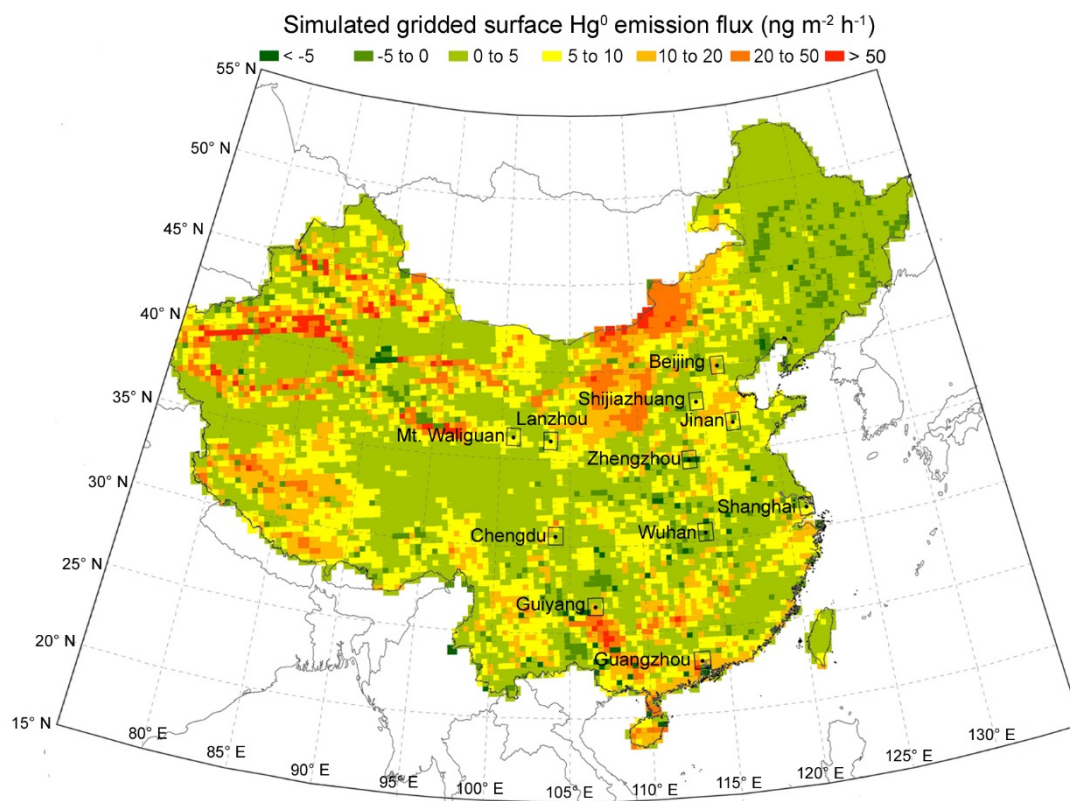

Figure S2 Distribution of the land cover types in the ten Chinese cities in 2018. Land cover type data are from Data Center for Resources and Environmental Science, Chinese Academy of Science (RESDC, <http://www.resdc.cn>) and in a spatial resolution of 1 km.

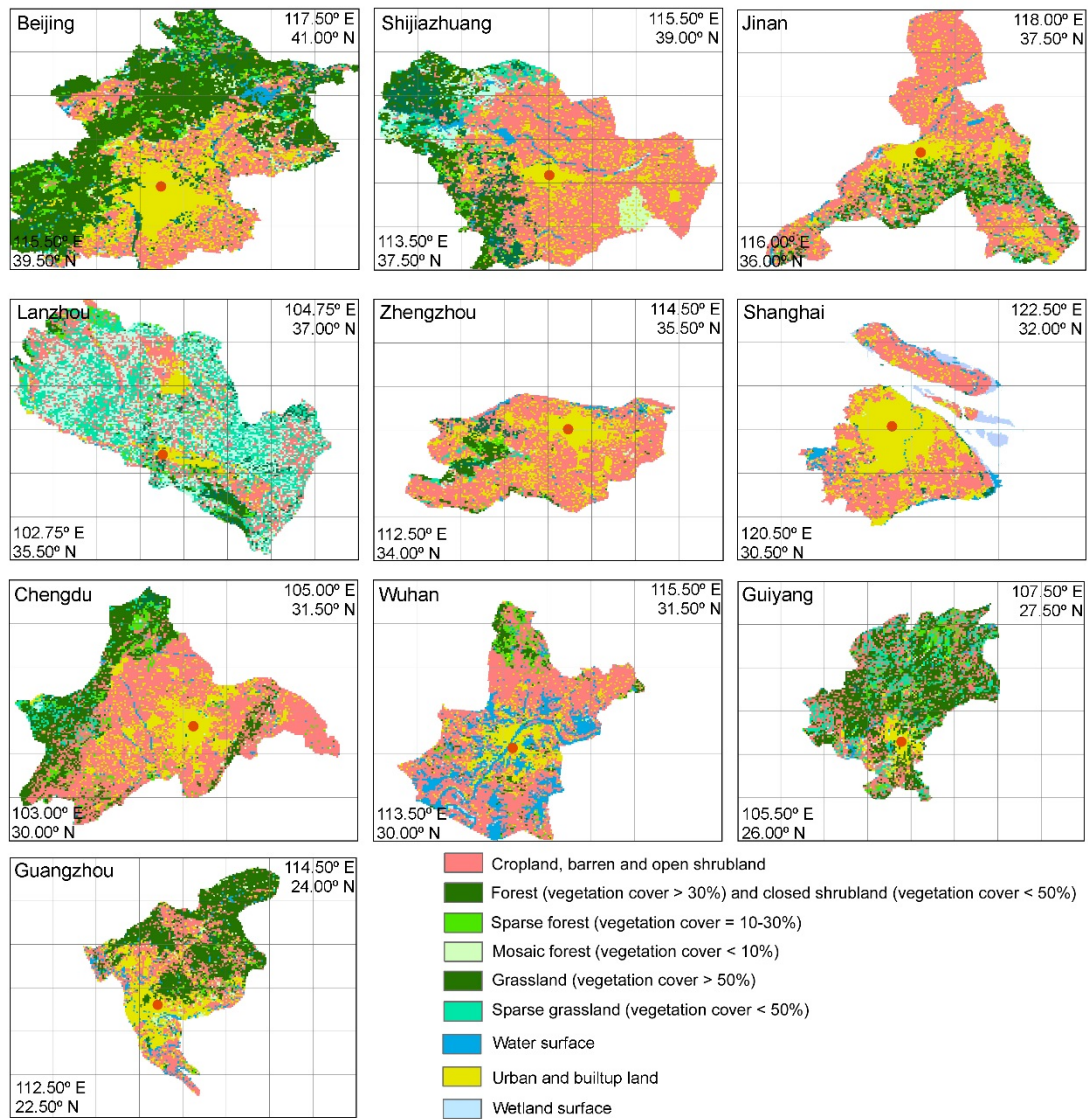

Figure S3 A diagram showing the field sampling of atmospheric total gaseous mercury (TGM)

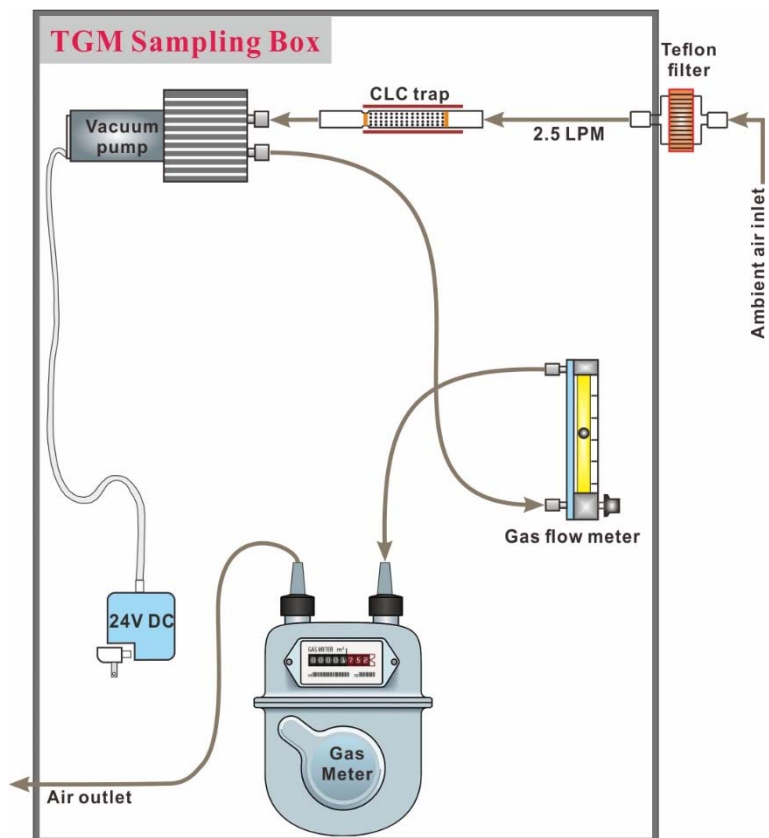

Figure S4 Daily GEM  $\delta^{202}\text{Hg}$  and  $\Delta^{199}\text{Hg}$  at the inlet and outlet of flux chamber, and estimated  $\delta^{202}\text{Hg}$  and  $\Delta^{199}\text{Hg}$  signatures of GEM emitted from soils in Guiyang and Wuhan based on binary mixing models. Lines are used to connect the daily isotopic compositions of GEM at the inlet and outlet of flux chamber and GEM emitted from soils.

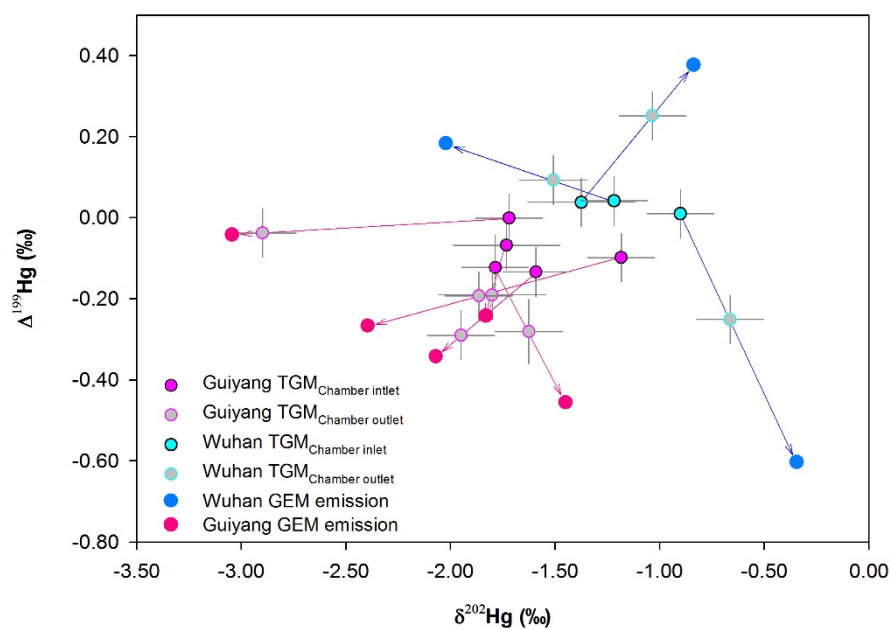

Figure S5 Summertime/wintertime concentration ratios of O<sub>3</sub>, normalized difference vegetation index (NDVI), and CO. Dotted lines represent the summertime/wintertime ratio of 1.

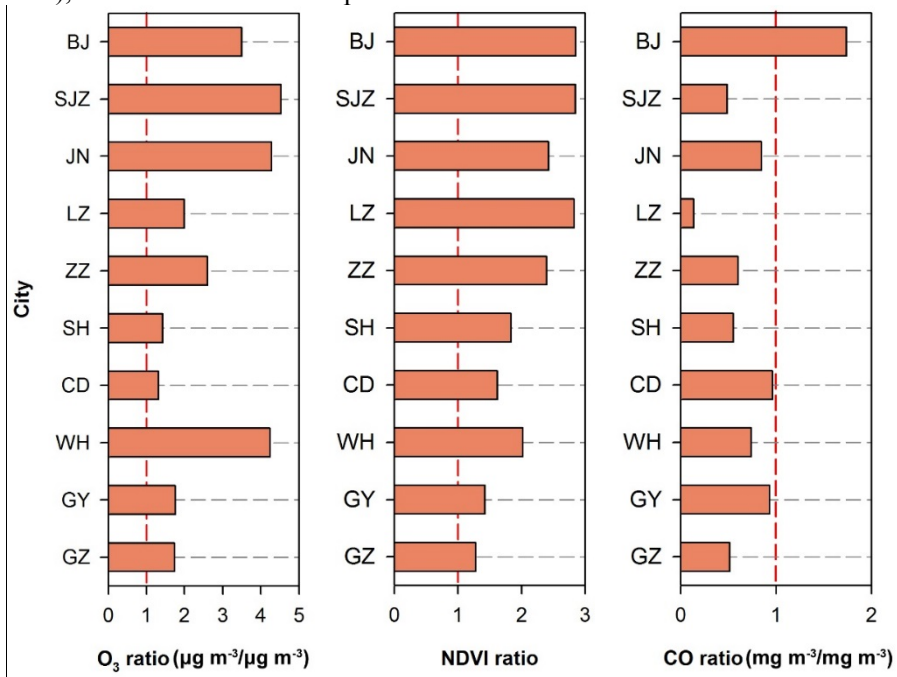

Figure S6 Wind rose diagrams of the wintertime and summertime sampling period in the ten cities

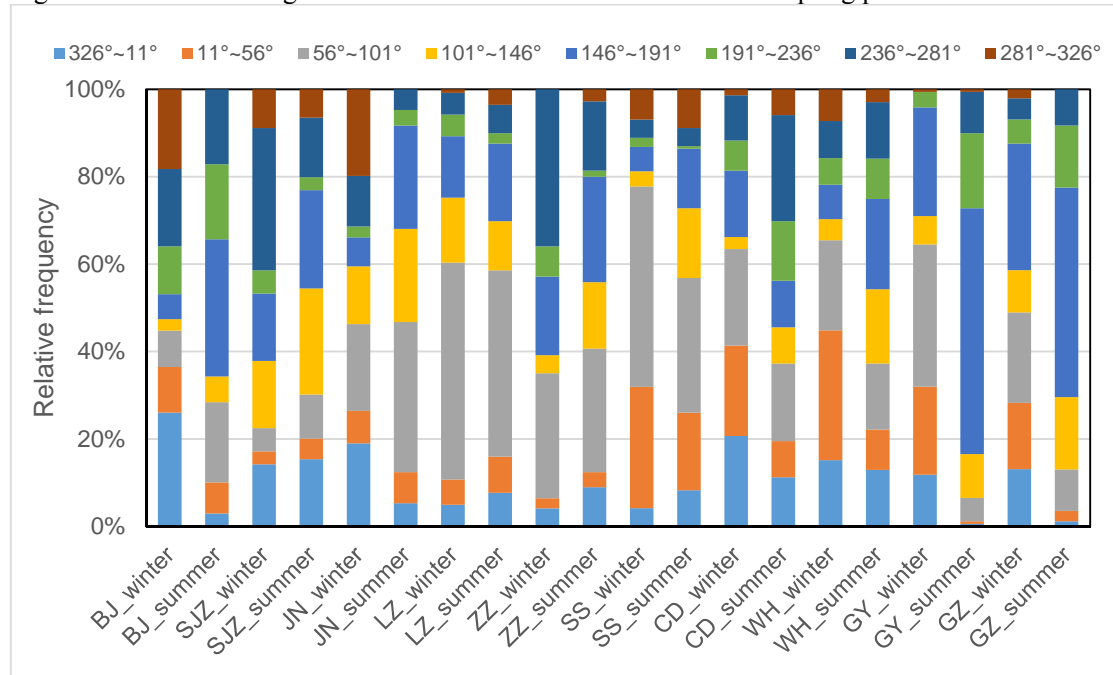

Figure S7 Effect of the soil  $\text{Hg}^0$  (GEM) emissions on the seasonal variations in TGM  $\delta^{202}\text{Hg}$  and  $\Delta^{199}\text{Hg}$  in the ten Chinese cities. (A) Seasonal amplitude of  $\delta^{202}\text{Hg}$  values ( $\delta^{202}\text{Hg}_{\text{summer}} - \delta^{202}\text{Hg}_{\text{winter}}$ ) versus seasonal amplitude of simulated soil  $\text{Hg}^0$  emissions flux  $((\text{flux}_{\text{July}} - \text{flux}_{\text{January}}) / \text{flux}_{\text{July}})$ . (B) Seasonal amplitude of  $\Delta^{199}\text{Hg}$  values ( $\Delta^{199}\text{Hg}_{\text{summer}} - \Delta^{199}\text{Hg}_{\text{winter}}$ ) versus seasonal amplitude of simulated soil  $\text{Hg}^0$  emissions flux  $((\text{flux}_{\text{July}} - \text{flux}_{\text{January}}) / \text{flux}_{\text{July}})$ . The data in Zhengzhou (unfilled red circle) was excluded from Figure S6A because an unique deposition pattern of GEM was simulated in winter of this city (Table S5), which might confound the effect of soil GEM emissions on the seasonal variations in TGM  $\delta^{202}\text{Hg}$ .

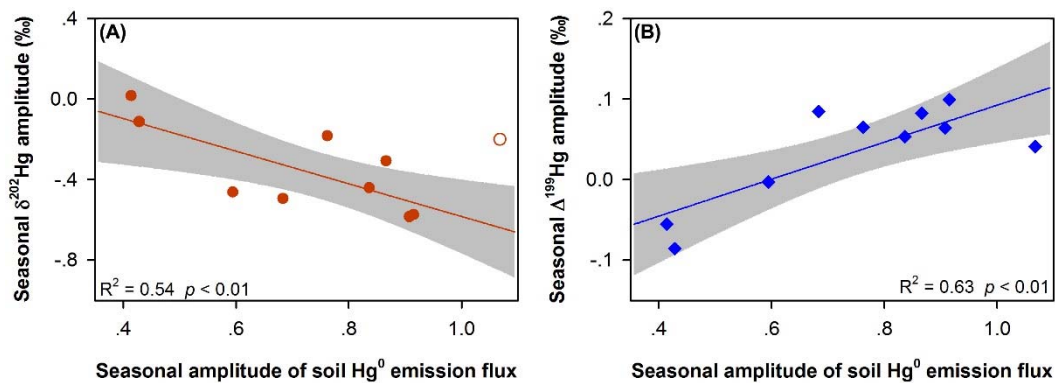



Figure S8 A York bivariate linear regression analysis between (A) daily atmospheric TGM  $\Delta^{199}\text{Hg}$  and  $\Delta^{201}\text{Hg}$  values in the ten Chinese cities and (B) daily GEM  $\Delta^{199}\text{Hg}$  and  $\Delta^{201}\text{Hg}$  emitted from cropland soils in Guiyang and Wuhan, China. Error bars are  $2\sigma$  analytical uncertainties of measured atmospheric TGM  $\Delta^{199}\text{Hg}$  and  $\Delta^{201}\text{Hg}$  and estimated soil emitted GEM  $\Delta^{199}\text{Hg}$  and  $\Delta^{201}\text{Hg}$ .

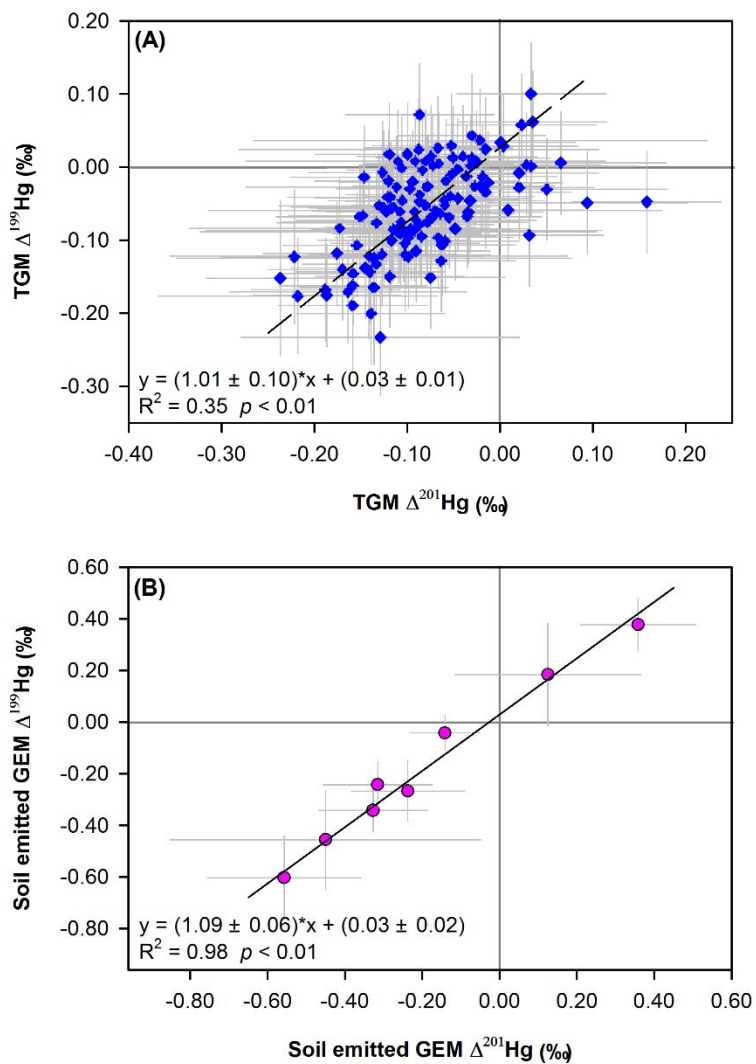

Table S1 Site location and sampling period in the present study as well as the site information and fraction of land cover types in the ten Chinese cities and Mt. Waliguan

| Site         | Long (°E) | Lat (°N) | Altitude (m a.s.l.) | Site category | Site information      |                      | Fraction of land cover types (%)                                                        |                                       |                              | Season | Study period               |
|--------------|-----------|----------|---------------------|---------------|-----------------------|----------------------|-----------------------------------------------------------------------------------------|---------------------------------------|------------------------------|--------|----------------------------|
|              |           |          |                     |               | Geographical Location | Population (million) | Croplands, open forests, open shrublands, open grassland, and barren lands <sup>a</sup> | Urban and build-up lands <sup>b</sup> | Vegetated lands <sup>c</sup> |        |                            |
| Beijing      | 116.370   | 39.975   | 10                  | Urban site    | Northern China        | 21.54                | 36.4                                                                                    | 35.2                                  | 26.3                         | Winter | 5 to 13 Jan 2018           |
|              |           |          |                     |               |                       |                      |                                                                                         |                                       |                              | Summer | 27 Jul to 3 Aug 2018       |
| Shijiazhuang | 114.505   | 38.043   | 80                  | Urban site    | Northern China        | 10.95                | 64.2                                                                                    | 21.3                                  | 11.1                         | Winter | 5 to 12 Jan 2018           |
|              |           |          |                     |               |                       |                      |                                                                                         |                                       |                              | Summer | 29 Jun to 6 Jul 2018       |
| Jinan        | 117.055   | 36.673   | 50                  | Urban site    | Eastern China         | 7.46                 | 65.6                                                                                    | 20.8                                  | 11.4                         | Winter | 7 to 12 Jan 2018           |
|              |           |          |                     |               |                       |                      |                                                                                         |                                       |                              | Summer | 29 Jun to 6 Jul 2018       |
| Lanzhou      | 103.631   | 36.103   | 1483                | Urban site    | Northwestern China    | 3.75                 | 82.3                                                                                    | 6.8                                   | 8.9                          | Winter | 7 to 12 Jan 2018           |
|              |           |          |                     |               |                       |                      |                                                                                         |                                       |                              | Summer | 27 Jul to 3 Aug 2018       |
| Zhengzhou    | 113.618   | 34.752   | 110                 | Urban site    | Central China         | 10.14                | 67.6                                                                                    | 25.5                                  | 4.2                          | Winter | 5 to 14 Jan 2018           |
|              |           |          |                     |               |                       |                      |                                                                                         |                                       |                              | Summer | 29 Jun to 5 Jul 2018       |
| Shanghai     | 121.390   | 31.266   | 25                  | Urban site    | Eastern China         | 23.24                | 49.7                                                                                    | 41.1                                  | 1.1                          | Winter | 20 to 26 Jan 2018          |
|              |           |          |                     |               |                       |                      |                                                                                         |                                       |                              | Summer | 27 Jul to 3 Aug 2018       |
| Chengdu      | 104.059   | 30.657   | 570                 | Urban site    | Southwestern China    | 16.33                | 68.3                                                                                    | 22                                    | 8.9                          | Winter | 19 to 25 Jan 2018          |
|              |           |          |                     |               |                       |                      |                                                                                         |                                       |                              | Summer | 27 Jul to 3 Aug 2018       |
| Wuhan        | 114.302   | 30.533   | 80                  | Urban site    | Central China         | 9.08                 | 57.9                                                                                    | 15.9                                  | 3.5                          | Winter | 19 to 26 Jan 2018          |
|              |           |          |                     |               |                       |                      |                                                                                         |                                       |                              | Summer | 27 Jul to 9 Aug 2018       |
| Guiyang      | 106.698   | 26.570   | 1055                | Urban site    | Southwestern China    | 4.88                 | 47°                                                                                     | 4.9                                   | 47.1                         | Winter | 18 to 25 Jan 2018          |
|              |           |          |                     |               |                       |                      |                                                                                         |                                       |                              | Summer | 29 Jun to 6 Jul 2018       |
| Guangzhou    | 113.358   | 23.149   | 70                  | Urban site    | Southern China        | 14.90                | 35.6                                                                                    | 32                                    | 21.1                         | Winter | 19 to 25 Jan 2018          |
|              |           |          |                     |               |                       |                      |                                                                                         |                                       |                              | Summer | 29 Jun to 6 Jul 2018       |
| Mt. Waliguan | 100.90    | 36.28    | 3816                | Rural site    | Northwestern China    | ----                 | 70.7                                                                                    | 7.3                                   | 17.0                         | Winter | 19 Nov 2014 to 19 Feb 2015 |

Table S2 Mean gaseous elemental mercury (GEM) and gaseous oxidized mercury (GOM) concentrations reported in Guiyang, Beijing, and Shanghai China as well as in Reno, USA.

| Site                         | Long (°E) | Lat (°N) | Altitude (m a.s.l.) | Study period         | Mean GEM ( $\pm 1$ sd) (ng m <sup>-3</sup> ) | Mean GOM ( $\pm 1$ sd) (pg m <sup>-3</sup> ) | Mean GOM fraction in TGM | Daily or weekly GOM fraction in TGM | Reference             |
|------------------------------|-----------|----------|---------------------|----------------------|----------------------------------------------|----------------------------------------------|--------------------------|-------------------------------------|-----------------------|
| Guiyang, China <sup>a</sup>  | 106.72    | 26.57    | 1041                | Aug to Dec 2009      | 9.72 $\pm$ 10.2                              | 35.7 $\pm$ 43.9                              | 0.37%                    | 0.04 to 1.58% (daily)               | (Fu et al., 2011)     |
| Beijing, China <sup>a</sup>  | 116.338   | 40.007   |                     | Sep 2015 to Jul 2016 | 4.70 $\pm$ 3.53                              | 18.5 $\pm$ 22.3                              | 0.39%                    | Data are not available              | (Zhang et al., 2019)  |
| Shanghai, China <sup>a</sup> | 120.998   | 31.098   | 17                  | Jun to Dec 2014      | 4.19 $\pm$ 9.13                              | 21 $\pm$ 100                                 | 0.50%                    | Data are not available              | (Duan et al., 2017)   |
| Reno, USA <sup>b</sup>       | -119.805  | 39.537   | 1377                | Feb to Jun 2019      | 1.24 $\pm$ 0.11                              | 33.3 $\pm$ 12.6                              | 2.7%                     | 1.4 to 5.2% (weekly)                | (Gustin et al., 2019) |

a) GOM concentrations were measured using the Tekran 2537/1130/1135 system.

b) GOM concentrations were measured using the cation exchange membrane method on weekly basis.

Table S3 Seal blanks and breakthrough of CLC traps as well as recovery and Hg isotopic compositions of lichen CRM (BCR 482), standard addition of NIST 3133 to CLC traps, and international standard NIST SRM 3177 over analytical sessions measured in this study. The 2 $\sigma$  represent the 2 times of the standard error (2 sd) of the mean isotopic compositions measured over analytical sessions.

| Test category                       | Data source                                               | n  | Concentration (ng), recovery (%), breakthrough (%) |         |            | Isotopic composition (‰) |            |                         |            |                         |            |                         |            |                         |            |                         |            |                         |            |                         |            |                         |            |
|-------------------------------------|-----------------------------------------------------------|----|----------------------------------------------------|---------|------------|--------------------------|------------|-------------------------|------------|-------------------------|------------|-------------------------|------------|-------------------------|------------|-------------------------|------------|-------------------------|------------|-------------------------|------------|-------------------------|------------|
|                                     |                                                           |    | Range                                              | Mean    | 1 $\sigma$ | $\delta^{199}\text{Hg}$  | 2 $\sigma$ | $\delta^{200}\text{Hg}$ | 2 $\sigma$ | $\delta^{201}\text{Hg}$ | 2 $\sigma$ | $\delta^{202}\text{Hg}$ | 2 $\sigma$ | $\delta^{204}\text{Hg}$ | 2 $\sigma$ | $\Delta^{199}\text{Hg}$ | 2 $\sigma$ | $\Delta^{200}\text{Hg}$ | 2 $\sigma$ | $\Delta^{201}\text{Hg}$ | 2 $\sigma$ | $\Delta^{204}\text{Hg}$ | 2 $\sigma$ |
| Seal blank test <sup>a</sup>        | This study                                                | 27 | 0.06 to 0.43 ng                                    | 0.20 ng | 0.09 ng    | --                       | --         | --                      | --         | --                      | --         | --                      | --         | --                      | --         | --                      | --         | --                      | --         | --                      | --         | --                      | --         |
| Breakthrough test <sup>b</sup>      | This study                                                | 10 | 0.4 to 3.3%                                        | 1.1%    | 0.9%       | --                       | --         | --                      | --         | --                      | --         | --                      | --         | --                      | --         | --                      | --         | --                      | --         | --                      | --         | --                      | --         |
| BCR 482 <sup>c</sup>                | This study                                                | 6  | 86.0 to 97.2%                                      | 92.5%   | 3.9%       | -0.99                    | 0.11       | -0.75                   | 0.18       | -1.86                   | 0.19       | -1.68                   | 0.21       | -2.52                   | 0.48       | -0.57                   | 0.11       | 0.09                    | 0.11       | -0.59                   | 0.13       | -0.03                   | 0.17       |
|                                     | Literature (Estrade et al., 2010; Blum and Johnson, 2017) |    |                                                    |         |            | -1.05 to -0.97           |            | -0.68 to -0.74          |            | -1.85 to -1.71          |            | -1.67 to -1.48          |            |                         |            | -0.67 to -0.56          |            | 0.06 to 0.08            |            | -0.68 to -0.60          |            | -0.10                   |            |
| Standard addition test <sup>d</sup> | This study                                                | 11 | 84.1 to 104.8%                                     | 93.2%   | 11.8%      | 0.01                     | 0.05       | -0.03                   | 0.11       | -0.04                   | 0.14       | -0.06                   | 0.16       | -0.19                   | 0.29       | 0.02                    | 0.07       | 0.00                    | 0.07       | 0.01                    | 0.08       | -0.05                   | 0.08       |
|                                     | Expected                                                  |    |                                                    | 100%    |            | 0.00                     |            | 0.00                    |            | 0.00                    |            | 0.00                    |            | 0.00                    |            | 0.00                    |            | 0.00                    |            | 0.00                    |            | 0.00                    |            |
| NIST 3177 test <sup>e</sup>         | This study                                                | 30 | --                                                 | --      | --         | -0.13                    | 0.06       | -0.27                   | 0.06       | -0.43                   | 0.09       | -0.54                   | 0.09       | -0.79                   | 0.27       | 0.01                    | 0.07       | 0.00                    | 0.06       | -0.02                   | 0.08       | 0.03                    | 0.25       |
|                                     | Literature (Sun et al., 2016)                             |    |                                                    |         |            | -0.14                    |            | -0.26                   |            | -0.42                   |            | -0.52                   |            |                         |            | 0.00                    |            | 0.00                    |            | -0.02                   |            |                         |            |

a): Tested by combustion of sealed field CLC traps (containing 0.5 g CLC) prepared before field sampling. The isotopic composition of these blanks were not measured due to their extremely Hg concentrations in trap solutions ( $\leq 0.043 \text{ ng mL}^{-1}$ ).

b): Tested by in the laboratory at the flow rate of  $2.5 \text{ L min}^{-1}$  over 24 hours following the method by Fu et al.(2014).

c): Tested by combustion of Lichen CRM (BCR 482) using the double-stage combustion method.

d): Tested by extraction of Hg from diluted NIST SRM 3133 solutions (a volume of 2.5 L and Hg concentrations of 2-10  $\text{ng L}^{-1}$ ) onto CLC traps using Hg-free air at a purging flow rate of  $2.5 \text{ L min}^{-1}$  within 1.5 h, followed by preconcentration of Hg on CLC traps to trap solutions using the combustion method.

e): Tested by direct measurements of the Hg isotopic compositions in the international standard NIST SRM 3133 solutions (concentration = 0.5 or  $1.0 \text{ ng mL}^{-1}$ ). Recoveries of these test were not available.

Table S4 Daily atmospheric TGM concentrations and isotopic compositions measured in this study. 2σ represents the analytical uncertainties of the isotopic compositions. δ<sup>204</sup>Hg and Δ<sup>199</sup>Hg were not measured for some samples (--) because of the limitations in instrumental collector designs of Neptune.

| Sample ID | Site         | Season | Sampling period                    | Volume sampled (m <sup>3</sup> ) | TGM conc. (ng m <sup>-3</sup> ) | δ <sup>199</sup> Hg (‰) |      | δ <sup>200</sup> Hg (‰) |      | δ <sup>201</sup> Hg (‰) |      | δ <sup>202</sup> Hg (‰) |      | δ <sup>204</sup> Hg (‰) |      | Δ <sup>199</sup> Hg (‰) |      | Δ <sup>200</sup> Hg (‰) |      | Δ <sup>201</sup> Hg (‰) |      | Δ <sup>204</sup> Hg (‰) |      |
|-----------|--------------|--------|------------------------------------|----------------------------------|---------------------------------|-------------------------|------|-------------------------|------|-------------------------|------|-------------------------|------|-------------------------|------|-------------------------|------|-------------------------|------|-------------------------|------|-------------------------|------|
|           |              |        |                                    |                                  |                                 | Value                   | 2σ   |
| BJ-01     | Beijing      | Winter | 2018/01/05 8:00 to 2018/01/06 8:00 | 2.69                             | 2.04                            | -0.12                   | 0.08 | -0.14                   | 0.11 | -0.23                   | 0.14 | -0.17                   | 0.18 | -0.26                   | 0.29 | -0.07                   | 0.07 | -0.06                   | 0.07 | -0.11                   | 0.13 | -0.01                   | 0.12 |
| BJ-02     |              |        | 2018/01/06 8:00 to 2018/01/07 8:00 | 3.13                             | 2.46                            | -0.05                   | 0.05 | -0.12                   | 0.11 | -0.25                   | 0.14 | -0.23                   | 0.16 | -0.25                   | 0.29 | 0.01                    | 0.07 | 0.00                    | 0.07 | -0.08                   | 0.19 | 0.09                    | 0.08 |
| BJ-03     |              |        | 2018/01/08 8:00 to 2018/01/09 8:00 | 3.13                             | 1.06                            | -0.17                   | 0.14 | -0.10                   | 0.11 | -0.10                   | 0.14 | 0.07                    | 0.20 | 0.03                    | 0.56 | -0.19                   | 0.09 | -0.14                   | 0.07 | -0.16                   | 0.08 | -0.07                   | 0.26 |
| BJ-04     |              |        | 2018/01/09 8:00 to 2018/01/10 8:00 | 2.99                             | 1.54                            | -0.13                   | 0.08 | 0.07                    | 0.11 | -0.04                   | 0.14 | 0.16                    | 0.18 | 0.36                    | 0.29 | -0.17                   | 0.07 | -0.01                   | 0.07 | -0.16                   | 0.13 | 0.13                    | 0.12 |
| BJ-05     |              |        | 2018/01/10 8:00 to 2018/01/11 8:00 | 2.54                             | 1.54                            | -0.04                   | 0.12 | 0.04                    | 0.28 | -0.06                   | 0.14 | 0.11                    | 0.18 | 0.31                    | 0.30 | -0.07                   | 0.07 | -0.02                   | 0.19 | -0.15                   | 0.08 | 0.14                    | 0.08 |
| BJ-06     |              |        | 2018/01/11 8:00 to 2018/01/12 8:00 | 3.24                             | 1.68                            | -0.10                   | 0.12 | -0.10                   | 0.28 | -0.12                   | 0.14 | -0.03                   | 0.18 | 0.12                    | 0.30 | -0.10                   | 0.07 | -0.08                   | 0.19 | -0.10                   | 0.08 | 0.18                    | 0.08 |
| BJ-07     |              |        | 2018/01/12 8:00 to 2018/01/13 8:00 | 3.33                             | 2.87                            | -0.11                   | 0.05 | -0.29                   | 0.11 | -0.49                   | 0.14 | -0.53                   | 0.16 | -0.80                   | 0.29 | 0.02                    | 0.07 | -0.02                   | 0.07 | -0.09                   | 0.19 | 0.00                    | 0.08 |
| BJ-08     |              | Summer | 2018/07/27 8:00 to 2018/07/28 8:00 | 2.67                             | 2.68                            | -0.12                   | 0.09 | -0.20                   | 0.11 | -0.43                   | 0.14 | -0.49                   | 0.16 | -0.64                   | 0.29 | 0.00                    | 0.07 | 0.04                    | 0.07 | -0.07                   | 0.08 | 0.09                    | 0.09 |
| BJ-09     |              |        | 2018/07/28 8:00 to 2018/07/29 8:00 | 2.39                             | 2.58                            | -0.19                   | 0.09 | -0.26                   | 0.11 | -0.56                   | 0.14 | -0.59                   | 0.16 | -0.88                   | 0.29 | -0.04                   | 0.07 | 0.04                    | 0.07 | -0.12                   | 0.08 | 0.00                    | 0.09 |
| BJ-10     |              |        | 2018/07/29 8:00 to 2018/07/30 8:00 | 2.57                             | 2.96                            | -0.11                   | 0.05 | -0.13                   | 0.11 | -0.30                   | 0.14 | -0.28                   | 0.16 | -0.45                   | 0.29 | -0.04                   | 0.07 | 0.01                    | 0.07 | -0.09                   | 0.08 | -0.03                   | 0.08 |
| BJ-11     |              |        | 2018/07/30 8:00 to 2018/07/31 8:00 | 2.93                             | 2.68                            | -0.03                   | 0.05 | -0.15                   | 0.11 | -0.40                   | 0.14 | -0.41                   | 0.16 | -0.62                   | 0.29 | 0.07                    | 0.07 | 0.06                    | 0.07 | -0.09                   | 0.08 | -0.01                   | 0.08 |
| BJ-12     |              |        | 2018/07/31 8:00 to 2018/08/01 8:00 | 3.31                             | 3.13                            | -0.05                   | 0.07 | -0.12                   | 0.11 | -0.28                   | 0.14 | -0.24                   | 0.16 | -0.43                   | 0.29 | 0.01                    | 0.07 | 0.01                    | 0.07 | -0.09                   | 0.08 | -0.06                   | 0.08 |
| BJ-13     |              |        | 2018/08/01 8:00 to 2018/08/02 8:00 | 2.83                             | 3.24                            | -0.10                   | 0.07 | -0.21                   | 0.11 | -0.41                   | 0.14 | -0.40                   | 0.16 | -0.63                   | 0.29 | 0.00                    | 0.07 | 0.00                    | 0.07 | -0.11                   | 0.08 | -0.04                   | 0.08 |
| BJ-14     |              |        | 2018/08/02 8:00 to 2018/08/03 8:00 | 3.02                             | 2.67                            | -0.08                   | 0.05 | -0.18                   | 0.11 | -0.39                   | 0.14 | -0.37                   | 0.16 | -0.54                   | 0.29 | 0.01                    | 0.07 | 0.00                    | 0.07 | -0.11                   | 0.08 | 0.01                    | 0.08 |
| SJZ-01    | Shijiazhuang | Winter | 2018/01/05 8:00 to 2018/01/06 8:00 | 3.70                             | 2.67                            | -0.36                   | 0.06 | -0.35                   | 0.11 | -0.78                   | 0.14 | -0.75                   | 0.16 | --                      | --   | -0.18                   | 0.08 | 0.02                    | 0.08 | -0.22                   | 0.15 | --                      | --   |
| SJZ-02    |              |        | 2018/01/06 8:00 to 2018/01/07 8:00 | 3.94                             | 2.69                            | -0.39                   | 0.06 | -0.27                   | 0.11 | -0.60                   | 0.14 | -0.63                   | 0.16 | --                      | --   | -0.23                   | 0.08 | 0.05                    | 0.08 | -0.13                   | 0.15 | --                      | --   |
| SJZ-03    |              |        | 2018/01/08 8:00 to 2018/01/09 8:00 | 4.05                             | 1.88                            | -0.17                   | 0.06 | -0.15                   | 0.11 | -0.26                   | 0.14 | -0.17                   | 0.16 | --                      | --   | -0.13                   | 0.07 | -0.06                   | 0.09 | -0.13                   | 0.08 | --                      | --   |
| SJZ-04    |              |        | 2018/01/09 8:00 to 2018/01/10 8:00 | 3.97                             | 1.21                            | -0.03                   | 0.06 | 0.18                    | 0.11 | 0.17                    | 0.17 | 0.45                    | 0.16 | --                      | --   | -0.14                   | 0.07 | -0.04                   | 0.07 | -0.17                   | 0.08 | --                      | --   |
| SJZ-05    |              |        | 2018/01/10 8:00 to 2018/01/11 8:00 | 3.85                             | 1.18                            | -0.23                   | 0.06 | -0.14                   | 0.11 | -0.22                   | 0.17 | -0.11                   | 0.16 | --                      | --   | -0.20                   | 0.07 | -0.08                   | 0.07 | -0.14                   | 0.08 | --                      | --   |
| SJZ-06    |              |        | 2018/01/11 8:00 to 2018/01/12 8:00 | 4.28                             | 2.02                            | -0.20                   | 0.05 | -0.15                   | 0.11 | -0.36                   | 0.14 | -0.31                   | 0.16 | --                      | --   | -0.12                   | 0.07 | 0.01                    | 0.07 | -0.13                   | 0.08 | --                      | --   |
| SJZ-07    |              | Summer | 2018/06/29 8:00 to 2018/06/30 8:00 | 3.74                             | 2.46                            | -0.34                   | 0.05 | -0.42                   | 0.11 | -0.62                   | 0.14 | -0.73                   | 0.16 | --                      | --   | -0.15                   | 0.07 | -0.05                   | 0.07 | -0.07                   | 0.08 | --                      | --   |
| SJZ-08    |              |        | 2018/06/30 8:00 to 2018/07/01 8:00 | 3.33                             | 2.74                            | -0.31                   | 0.15 | -0.42                   | 0.19 | -0.70                   | 0.31 | -0.74                   | 0.16 | --                      | --   | -0.12                   | 0.11 | -0.05                   | 0.13 | -0.14                   | 0.21 | --                      | --   |
| SJZ-09    |              |        | 2018/07/01 8:00 to 2018/07/02 8:00 | 3.26                             | 2.21                            | -0.26                   | 0.10 | -0.39                   | 0.13 | -0.71                   | 0.26 | -0.71                   | 0.16 | --                      | --   | -0.08                   | 0.07 | -0.03                   | 0.07 | -0.17                   | 0.16 | --                      | --   |
| SJZ-10    |              |        | 2018/07/02 8:00 to 2018/07/03 8:00 | 3.66                             | 4.33                            | -0.35                   | 0.10 | -0.65                   | 0.13 | -1.08                   | 0.26 | -1.29                   | 0.16 | --                      | --   | -0.03                   | 0.07 | 0.00                    | 0.07 | -0.11                   | 0.16 | --                      | --   |
| SJZ-11    |              |        | 2018/07/03 8:00 to 2018/07/04 8:00 | 3.02                             | 3.74                            | -0.26                   | 0.07 | -0.47                   | 0.15 | -0.76                   | 0.24 | -0.90                   | 0.28 | --                      | --   | -0.03                   | 0.07 | -0.02                   | 0.07 | -0.08                   | 0.08 | --                      | --   |
| SJZ-12    |              |        | 2018/07/04 8:00 to 2018/07/05 8:00 | 2.55                             | 4.27                            | -0.21                   | 0.07 | -0.39                   | 0.11 | -0.70                   | 0.14 | -0.82                   | 0.16 | --                      | --   | 0.00                    | 0.07 | 0.03                    | 0.07 | -0.08                   | 0.08 | --                      | --   |
| SJZ-13    |              |        | 2018/07/05 8:00 to 2018/07/06 8:00 | 3.16                             | 3.64                            | -0.22                   | 0.07 | -0.30                   | 0.11 | -0.55                   | 0.14 | -0.61                   | 0.16 | --                      | --   | -0.06                   | 0.07 | 0.01                    | 0.07 | -0.09                   | 0.08 | --                      | --   |



|              |        |                                    |      |      |       |      |       |      |       |      |       |      |       |      |       |      |       |      |       |      |       |      |
|--------------|--------|------------------------------------|------|------|-------|------|-------|------|-------|------|-------|------|-------|------|-------|------|-------|------|-------|------|-------|------|
| <b>ZZ-08</b> | Summer | 2018/01/12 8:00 to 2018/01/13 8:00 | 3.38 | 3.92 | -0.23 | 0.06 | -0.34 | 0.11 | -0.56 | 0.14 | -0.81 | 0.19 | --    | --   | -0.03 | 0.07 | 0.07  | 0.07 | 0.05  | 0.13 | --    | --   |
| <b>ZZ-09</b> |        | 2018/06/29 8:00 to 2018/06/30 8:00 | 2.27 | 3.59 | -0.15 | 0.05 | -0.29 | 0.11 | -0.55 | 0.14 | -0.64 | 0.16 | --    | --   | 0.01  | 0.07 | 0.03  | 0.07 | -0.07 | 0.08 | --    | --   |
| <b>ZZ-10</b> |        | 2018/06/30 8:00 to 2018/07/01 8:00 | 2.82 | 5.05 | -0.14 | 0.05 | -0.24 | 0.11 | -0.46 | 0.14 | -0.57 | 0.16 | --    | --   | 0.01  | 0.07 | 0.05  | 0.07 | -0.03 | 0.08 | --    | --   |
| <b>ZZ-11</b> |        | 2018/07/01 8:00 to 2018/07/02 8:00 | 2.34 | 3.70 | -0.19 | 0.05 | -0.29 | 0.11 | -0.53 | 0.14 | -0.57 | 0.16 | --    | --   | -0.05 | 0.07 | -0.01 | 0.07 | -0.11 | 0.08 | --    | --   |
| <b>ZZ-12</b> |        | 2018/07/02 8:00 to 2018/07/03 8:00 | 2.62 | 4.08 | -0.19 | 0.06 | -0.21 | 0.11 | -0.39 | 0.14 | -0.47 | 0.16 | --    | --   | -0.07 | 0.07 | 0.03  | 0.07 | -0.04 | 0.08 | --    | --   |
| <b>ZZ-13</b> |        | 2018/07/03 8:00 to 2018/07/04 8:00 | 2.96 | 3.27 | -0.25 | 0.06 | -0.26 | 0.11 | -0.44 | 0.14 | -0.80 | 0.16 | --    | --   | -0.05 | 0.07 | 0.13  | 0.07 | 0.16  | 0.08 | --    | --   |
| <b>ZZ-14</b> |        | 2018/07/04 8:00 to 2018/07/05 8:00 | 3.60 | 5.13 | -0.26 | 0.05 | -0.30 | 0.11 | -0.52 | 0.14 | -0.61 | 0.16 | --    | --   | -0.10 | 0.07 | 0.01  | 0.07 | -0.06 | 0.08 | --    | --   |
| <b>SH-01</b> | Winter | 2018/01/20 8:00 to 2018/01/21 8:00 | 2.64 | 2.96 | -0.19 | 0.05 | -0.22 | 0.11 | -0.41 | 0.14 | -0.44 | 0.16 | --    | --   | -0.08 | 0.07 | 0.00  | 0.07 | -0.08 | 0.11 | --    | --   |
| <b>SH-02</b> |        | 2018/01/21 8:00 to 2018/01/22 8:00 | 2.67 | 1.66 | -0.21 | 0.05 | -0.13 | 0.11 | -0.30 | 0.14 | -0.15 | 0.16 | -0.28 | 0.29 | -0.17 | 0.07 | -0.06 | 0.07 | -0.19 | 0.08 | -0.05 | 0.08 |
| <b>SH-03</b> |        | 2018/01/22 8:00 to 2018/01/23 8:00 | 2.65 | 3.03 | -0.16 | 0.05 | -0.23 | 0.11 | -0.44 | 0.14 | -0.41 | 0.16 | --    | --   | -0.05 | 0.07 | -0.02 | 0.07 | -0.13 | 0.11 | --    | --   |
| <b>SH-04</b> |        | 2018/01/23 8:00 to 2018/01/24 8:00 | 2.69 | 1.75 | -0.02 | 0.14 | -0.01 | 0.16 | -0.01 | 0.14 | 0.15  | 0.16 | 0.23  | 0.29 | -0.06 | 0.11 | -0.09 | 0.08 | -0.13 | 0.08 | 0.01  | 0.51 |
| <b>SH-05</b> |        | 2018/01/24 8:00 to 2018/01/25 8:00 | 2.61 | 1.80 | -0.10 | 0.14 | 0.01  | 0.16 | 0.05  | 0.14 | 0.25  | 0.16 | 0.55  | 0.29 | -0.16 | 0.11 | -0.12 | 0.08 | -0.14 | 0.08 | 0.18  | 0.51 |
| <b>SH-06</b> |        | 2018/01/25 8:00 to 2018/01/26 8:00 | 2.62 | 1.52 | -0.11 | 0.14 | 0.02  | 0.16 | -0.11 | 0.14 | 0.17  | 0.16 | 0.35  | 0.29 | -0.15 | 0.11 | -0.07 | 0.08 | -0.24 | 0.08 | 0.10  | 0.51 |
| <b>SH-07</b> | Summer | 2018/07/27 8:00 to 2018/07/28 8:00 | 2.40 | 3.13 | -0.24 | 0.05 | -0.43 | 0.11 | -0.83 | 0.14 | -0.91 | 0.17 | -1.27 | 0.29 | -0.01 | 0.07 | 0.03  | 0.07 | -0.15 | 0.08 | 0.10  | 0.30 |
| <b>SH-08</b> |        | 2018/07/28 8:00 to 2018/07/29 8:00 | 2.36 | 3.28 | -0.23 | 0.10 | -0.35 | 0.11 | -0.64 | 0.23 | -0.70 | 0.16 | -0.98 | 0.53 | -0.05 | 0.07 | 0.00  | 0.07 | -0.12 | 0.11 | 0.06  | 0.29 |
| <b>SH-09</b> |        | 2018/07/29 8:00 to 2018/07/30 8:00 | 2.46 | 2.47 | -0.10 | 0.05 | -0.10 | 0.11 | -0.39 | 0.14 | -0.35 | 0.16 | -0.55 | 0.38 | -0.01 | 0.07 | 0.07  | 0.07 | -0.13 | 0.08 | -0.03 | 0.40 |
| <b>SH-10</b> |        | 2018/07/30 8:00 to 2018/07/31 8:00 | 2.73 | 2.63 | -0.21 | 0.10 | -0.26 | 0.11 | -0.53 | 0.23 | -0.53 | 0.16 | -0.73 | 0.53 | -0.08 | 0.07 | 0.01  | 0.07 | -0.13 | 0.11 | 0.06  | 0.29 |
| <b>SH-11</b> |        | 2018/07/31 8:00 to 2018/08/01 8:00 | 2.39 | 2.35 | -0.09 | 0.05 | -0.17 | 0.11 | -0.41 | 0.14 | -0.46 | 0.16 | -0.72 | 0.38 | 0.03  | 0.07 | 0.07  | 0.07 | -0.07 | 0.08 | -0.03 | 0.40 |
| <b>SH-12</b> |        | 2018/08/01 8:00 to 2018/08/02 8:00 | 2.77 | 2.02 | -0.18 | 0.05 | -0.22 | 0.11 | -0.41 | 0.15 | -0.46 | 0.16 | -0.77 | 0.29 | -0.06 | 0.07 | 0.01  | 0.07 | -0.06 | 0.08 | -0.08 | 0.28 |
| <b>SH-13</b> |        | 2018/08/02 8:00 to 2018/08/03 8:00 | 3.08 | 2.01 | -0.14 | 0.05 | -0.25 | 0.11 | -0.48 | 0.15 | -0.55 | 0.16 | -0.79 | 0.29 | 0.00  | 0.07 | 0.03  | 0.07 | -0.07 | 0.08 | 0.02  | 0.28 |
| <b>CD-01</b> | Winter | 2018/01/18 8:00 to 2018/01/19 8:00 | 1.08 | 4.76 | -0.11 | 0.07 | -0.16 | 0.11 | -0.29 | 0.17 | -0.37 | 0.16 | --    | --   | -0.01 | 0.07 | 0.02  | 0.07 | -0.02 | 0.08 | --    | --   |
| <b>CD-02</b> |        | 2018/01/19 8:00 to 2018/01/20 8:00 | 2.01 | 2.29 | 0.10  | 0.07 | 0.26  | 0.11 | 0.48  | 0.17 | 0.63  | 0.16 | --    | --   | -0.06 | 0.07 | -0.06 | 0.07 | 0.01  | 0.08 | --    | --   |
| <b>CD-03</b> |        | 2018/01/20 8:00 to 2018/01/21 8:00 | 2.80 | 4.23 | -0.10 | 0.05 | -0.22 | 0.11 | -0.37 | 0.14 | -0.45 | 0.16 | --    | --   | 0.01  | 0.07 | 0.01  | 0.07 | -0.03 | 0.08 | --    | --   |
| <b>CD-04</b> |        | 2018/01/21 8:00 to 2018/01/22 8:00 | 2.89 | 4.70 | -0.16 | 0.05 | -0.27 | 0.11 | -0.42 | 0.14 | -0.52 | 0.16 | --    | --   | -0.03 | 0.07 | -0.01 | 0.07 | -0.03 | 0.08 | --    | --   |
| <b>CD-05</b> |        | 2018/01/22 8:00 to 2018/01/23 8:00 | 2.79 | 5.37 | -0.12 | 0.05 | -0.28 | 0.11 | -0.50 | 0.14 | -0.59 | 0.16 | --    | --   | 0.03  | 0.07 | 0.02  | 0.07 | -0.05 | 0.08 | --    | --   |
| <b>CD-06</b> |        | 2018/01/23 8:00 to 2018/01/24 8:00 | 3.14 | 6.59 | -0.19 | 0.05 | -0.40 | 0.11 | -0.65 | 0.14 | -0.87 | 0.16 | --    | --   | 0.03  | 0.07 | 0.03  | 0.07 | 0.00  | 0.08 | --    | --   |
| <b>CD-07</b> |        | 2018/01/24 8:00 to 2018/01/25 8:00 | 3.06 | 3.20 | -0.32 | 0.05 | -0.49 | 0.11 | -0.79 | 0.14 | -0.98 | 0.16 | --    | --   | -0.07 | 0.07 | 0.00  | 0.07 | -0.05 | 0.08 | --    | --   |
| <b>CD-08</b> | Summer | 2018/07/27 8:00 to 2018/07/28 8:00 | 2.78 | 3.77 | -0.26 | 0.08 | -0.53 | 0.11 | -0.74 | 0.14 | -0.96 | 0.16 | -1.35 | 0.29 | -0.02 | 0.07 | -0.04 | 0.07 | -0.01 | 0.08 | 0.09  | 0.10 |
| <b>CD-09</b> |        | 2018/07/28 8:00 to 2018/07/29 8:00 | 3.02 | 5.89 | -0.29 | 0.09 | -0.52 | 0.12 | -0.76 | 0.14 | -1.04 | 0.16 | -1.56 | 0.29 | -0.03 | 0.07 | 0.00  | 0.08 | 0.02  | 0.08 | -0.01 | 0.12 |
| <b>CD-10</b> |        | 2018/07/29 8:00 to 2018/07/30 8:00 | 3.15 | 4.44 | -0.21 | 0.09 | -0.43 | 0.12 | -0.67 | 0.14 | -0.85 | 0.16 | -1.24 | 0.29 | 0.00  | 0.07 | 0.00  | 0.08 | -0.03 | 0.08 | 0.03  | 0.12 |
| <b>CD-11</b> |        | 2018/07/30 8:00 to 2018/07/31 8:00 | 3.22 | 3.01 | -0.24 | 0.05 | -0.47 | 0.11 | -0.68 | 0.14 | -0.99 | 0.16 | -1.46 | 0.29 | 0.01  | 0.07 | 0.03  | 0.07 | 0.07  | 0.11 | 0.02  | 0.08 |

|              |         |                                    |                                    |      |       |       |       |       |       |       |       |       |       |       |       |       |      |       |      |       |      |       |      |
|--------------|---------|------------------------------------|------------------------------------|------|-------|-------|-------|-------|-------|-------|-------|-------|-------|-------|-------|-------|------|-------|------|-------|------|-------|------|
| <b>CD-12</b> |         |                                    | 2018/07/31 8:00 to 2018/08/01 8:00 | 2.52 | 5.44  | -0.19 | 0.05  | -0.33 | 0.11  | -0.53 | 0.14  | -0.75 | 0.16  | -1.19 | 0.29  | 0.00  | 0.07 | 0.05  | 0.07 | 0.03  | 0.11 | -0.06 | 0.08 |
| <b>CD-13</b> |         |                                    | 2018/08/01 8:00 to 2018/08/02 8:00 | 2.40 | 5.72  | -0.31 | 0.05  | -0.50 | 0.11  | -0.81 | 0.27  | -0.98 | 0.16  | -1.45 | 0.29  | -0.06 | 0.07 | 0.00  | 0.07 | -0.07 | 0.24 | 0.01  | 0.11 |
| <b>CD-14</b> |         |                                    | 2018/08/02 8:00 to 2018/08/03 8:00 | 2.92 | 4.35  | -0.17 | 0.05  | -0.38 | 0.11  | -0.63 | 0.27  | -0.81 | 0.16  | -1.18 | 0.29  | 0.04  | 0.07 | 0.03  | 0.07 | -0.02 | 0.24 | 0.03  | 0.11 |
| <b>WH-01</b> | Wuhan   | Winter                             | 2018/01/19 8:00 to 2018/01/20 8:00 | 3.07 | 6.54  | -0.28 | 0.09  | -0.42 | 0.18  | -0.76 | 0.16  | -0.91 | 0.31  | -1.37 | 0.31  | -0.05 | 0.07 | 0.03  | 0.07 | -0.08 | 0.08 | -0.02 | 0.15 |
| <b>WH-02</b> |         |                                    | 2018/01/20 8:00 to 2018/01/21 8:00 | 3.62 | 3.44  | -0.24 | 0.09  | -0.28 | 0.18  | -0.52 | 0.16  | -0.59 | 0.31  | -0.93 | 0.31  | -0.10 | 0.07 | 0.02  | 0.07 | -0.08 | 0.08 | -0.06 | 0.15 |
| <b>WH-03</b> |         |                                    | 2018/01/21 8:00 to 2018/01/22 8:00 | 2.59 | 3.89  | -0.23 | 0.05  | -0.36 | 0.11  | -0.60 | 0.16  | -0.78 | 0.16  | -1.18 | 0.29  | -0.03 | 0.08 | 0.03  | 0.08 | -0.02 | 0.09 | -0.02 | 0.08 |
| <b>WH-04</b> |         |                                    | 2018/01/22 8:00 to 2018/01/23 8:00 | 2.94 | 4.80  | --    | --    | --    | --    | --    | --    | --    | --    | --    | --    | --    | --   | --    | --   | --    | --   | --    | --   |
| <b>WH-05</b> |         |                                    | 2018/01/23 8:00 to 2018/01/24 8:00 | 3.32 | 2.61  | -0.26 | 0.05  | -0.31 | 0.11  | -0.51 | 0.16  | -0.54 | 0.16  | -0.90 | 0.29  | -0.12 | 0.08 | -0.04 | 0.08 | -0.10 | 0.09 | -0.09 | 0.08 |
| <b>WH-06</b> |         |                                    | 2018/01/24 8:00 to 2018/01/25 8:00 | 3.31 | 1.71  | -0.19 | 0.05  | -0.31 | 0.12  | -0.40 | 0.19  | -0.38 | 0.16  | -0.52 | 0.29  | -0.09 | 0.07 | -0.12 | 0.14 | -0.11 | 0.21 | 0.05  | 0.15 |
| <b>WH-07</b> |         |                                    | 2018/01/25 8:00 to 2018/01/26 8:00 | 3.35 | 1.69  | -0.21 | 0.05  | -0.29 | 0.12  | -0.38 | 0.19  | -0.33 | 0.16  | -0.31 | 0.29  | -0.12 | 0.07 | -0.12 | 0.14 | -0.14 | 0.21 | 0.18  | 0.15 |
| <b>WH-08</b> |         | Summer                             | 2018/07/27 8:00 to 2018/07/28 8:00 | 2.90 | 3.16  | -0.26 | 0.07  | -0.52 | 0.11  | -0.81 | 0.14  | -1.01 | 0.16  | --    | --    | -0.01 | 0.07 | -0.01 | 0.07 | -0.05 | 0.08 | --    | --   |
| <b>WH-09</b> |         |                                    | 2018/07/28 8:00 to 2018/07/29 8:00 | 2.30 | 3.59  | -0.26 | 0.07  | -0.50 | 0.11  | -0.79 | 0.14  | -0.95 | 0.16  | --    | --    | -0.03 | 0.07 | -0.03 | 0.07 | -0.08 | 0.08 | --    | --   |
| <b>WH-10</b> |         |                                    | 2018/07/29 8:00 to 2018/07/30 8:00 | 2.84 | 4.05  | -0.28 | 0.07  | -0.54 | 0.11  | -0.87 | 0.14  | -1.09 | 0.16  | --    | --    | 0.00  | 0.07 | 0.01  | 0.07 | -0.05 | 0.08 | --    | --   |
| <b>WH-11</b> |         |                                    | 2018/07/31 8:00 to 2018/08/01 8:00 | 2.53 | 4.41  | -0.32 | 0.05  | -0.50 | 0.11  | -0.78 | 0.14  | -0.92 | 0.16  | --    | --    | -0.09 | 0.07 | -0.03 | 0.07 | -0.09 | 0.08 | --    | --   |
| <b>WH-12</b> |         |                                    | 2018/08/01 8:00 to 2018/08/02 8:00 | 2.55 | 4.21  | -0.16 | 0.05  | -0.26 | 0.11  | -0.47 | 0.14  | -0.52 | 0.16  | --    | --    | -0.03 | 0.07 | 0.00  | 0.07 | -0.08 | 0.08 | --    | --   |
| <b>WH-13</b> |         |                                    | 2018/08/02 8:00 to 2018/08/03 8:00 | 2.18 | 4.20  | -0.16 | 0.05  | -0.29 | 0.11  | -0.56 | 0.14  | -0.68 | 0.16  | --    | --    | 0.01  | 0.07 | 0.05  | 0.07 | -0.05 | 0.08 | --    | --   |
| <b>WH-14</b> |         |                                    | 2018/08/03 8:00 to 2018/08/04 8:00 | 2.72 | 2.98  | -0.24 | 0.05  | -0.31 | 0.11  | -0.58 | 0.14  | -0.62 | 0.16  | --    | --    | -0.09 | 0.07 | 0.01  | 0.07 | -0.12 | 0.08 | --    | --   |
| <b>WH-15</b> |         |                                    | 2018/08/07 8:00 to 2018/08/08 8:00 | 1.45 | 4.83  | -0.12 | 0.05  | -0.27 | 0.11  | -0.50 | 0.14  | -0.53 | 0.16  | --    | --    | 0.02  | 0.07 | 0.00  | 0.07 | -0.10 | 0.08 | --    | --   |
| <b>WH-16</b> |         |                                    | 2018/08/08 8:00 to 2018/08/09 8:00 | 3.09 | 4.53  | -0.14 | 0.05  | -0.31 | 0.11  | -0.59 | 0.14  | -0.62 | 0.16  | --    | --    | 0.02  | 0.07 | 0.00  | 0.07 | -0.12 | 0.08 | --    | --   |
| <b>GY-01</b> | Guiyang | Winter                             | 2018/01/18 8:00 to 2018/01/24 8:00 | 2.84 | 9.39  | -0.32 | 0.05  | -0.83 | 0.11  | -1.23 | 0.14  | -1.68 | 0.16  | -2.38 | 0.29  | 0.10  | 0.07 | 0.01  | 0.09 | 0.03  | 0.08 | 0.12  | 0.08 |
| <b>GY-02</b> |         |                                    | 2018/01/19 8:00 to 2018/01/20 8:00 | 3.22 | 5.81  | -0.27 | 0.05  | -0.63 | 0.11  | -0.94 | 0.14  | -1.29 | 0.16  | -1.76 | 0.29  | 0.06  | 0.07 | 0.02  | 0.09 | 0.02  | 0.08 | 0.16  | 0.08 |
| <b>GY-03</b> |         |                                    | 2018/01/20 8:00 to 2018/01/21 8:00 | 3.22 | 5.21  | -0.30 | 0.05  | -0.58 | 0.11  | -0.89 | 0.16  | -1.13 | 0.16  | -1.68 | 0.29  | -0.01 | 0.07 | -0.01 | 0.07 | -0.04 | 0.08 | 0.01  | 0.15 |
| <b>GY-04</b> |         |                                    | 2018/01/21 8:00 to 2018/01/22 8:00 | 2.70 | 5.66  | -0.24 | 0.05  | -0.59 | 0.11  | -0.87 | 0.16  | -1.20 | 0.16  | -1.90 | 0.29  | 0.06  | 0.07 | 0.01  | 0.07 | 0.04  | 0.08 | -0.11 | 0.15 |
| <b>GY-05</b> |         |                                    | 2018/01/22 8:00 to 2018/01/23 8:00 | 2.64 | 5.70  | -0.12 | 0.08  | -0.24 | 0.13  | -0.39 | 0.23  | -0.49 | 0.23  | -0.78 | 0.29  | 0.01  | 0.07 | 0.00  | 0.07 | -0.03 | 0.08 | -0.05 | 0.08 |
| <b>GY-06</b> |         |                                    | 2018/01/23 8:00 to 2018/01/24 8:00 | 3.14 | 4.40  | -0.01 | 0.08  | -0.09 | 0.13  | -0.14 | 0.23  | -0.19 | 0.23  | -0.23 | 0.29  | 0.03  | 0.07 | 0.01  | 0.07 | 0.00  | 0.08 | 0.05  | 0.08 |
| <b>GY-07</b> |         | 2018/01/24 8:00 to 2018/01/25 8:00 | 2.39                               | 2.91 | -0.10 | 0.06  | -0.16 | 0.11  | -0.25 | 0.14  | -0.36 | 0.16  | -0.38 | 0.51  | -0.01 | 0.07  | 0.01 | 0.08  | 0.02 | 0.09  | 0.16 | 0.54  |      |
| <b>GY-08</b> |         | Summer                             | 2018/06/29 8:00 to 2018/06/30 8:00 | 2.51 | 2.06  | --    | --    | --    | --    | --    | --    | --    | --    | --    | --    | --    | --   | --    | --   | --    | --   | --    |      |
| <b>GY-09</b> |         |                                    | 2018/06/30 8:00 to 2018/07/01 8:00 | 2.72 | 2.16  | -0.34 | 0.05  | -0.51 | 0.11  | -0.76 | 0.14  | -1.14 | 0.16  | --    | --    | -0.05 | 0.07 | 0.06  | 0.07 | 0.09  | 0.11 | --    | --   |
| <b>GY-10</b> |         |                                    | 2018/07/01 8:00 to 2018/07/02 8:00 | 3.04 | 2.14  | -0.27 | 0.05  | -0.37 | 0.11  | -0.64 | 0.14  | -0.73 | 0.16  | --    | --    | -0.08 | 0.07 | -0.01 | 0.07 | -0.10 | 0.11 | --    | --   |
| <b>GY-11</b> |         |                                    | 2018/07/02 8:00 to 2018/07/03 8:00 | 3.23 | 2.56  | -0.28 | 0.05  | -0.50 | 0.11  | -0.83 | 0.14  | -0.94 | 0.16  | --    | --    | -0.04 | 0.07 | -0.03 | 0.07 | -0.12 | 0.11 | --    | --   |
| <b>GY-12</b> |         |                                    | 2018/07/03 8:00 to 2018/07/04 8:00 | 2.60 | 2.39  | -0.31 | 0.05  | -0.47 | 0.11  | -0.79 | 0.14  | -0.95 | 0.16  | --    | --    | -0.07 | 0.07 | 0.01  | 0.07 | -0.07 | 0.08 | --    | --   |



|                |              |        |                                    |                                    |      |       |       |       |       |       |       |       |       |       |       |       |       |       |       |       |       |      |       |      |
|----------------|--------------|--------|------------------------------------|------------------------------------|------|-------|-------|-------|-------|-------|-------|-------|-------|-------|-------|-------|-------|-------|-------|-------|-------|------|-------|------|
| <b>GY-13</b>   |              |        | 2018/07/04 8:00 to 2018/07/05 8:00 | 3.09                               | 2.35 | -0.36 | 0.05  | -0.55 | 0.11  | -0.90 | 0.14  | -1.05 | 0.16  | --    | --    | -0.09 | 0.07  | -0.02 | 0.07  | -0.11 | 0.08  | --   | --    |      |
| <b>GY-14</b>   |              |        | 2018/07/05 8:00 to 2018/07/06 8:00 | 3.24                               | 2.98 | -0.30 | 0.05  | -0.65 | 0.11  | -1.00 | 0.14  | -1.31 | 0.16  | --    | --    | 0.02  | 0.07  | 0.01  | 0.07  | -0.02 | 0.08  | --   | --    |      |
| <b>GZ-01</b>   | Guangzhou    | Winter | 2018/01/18 8:00 to 2018/01/24 8:00 | 3.92                               | 4.50 | -0.17 | 0.05  | -0.31 | 0.11  | -0.55 | 0.14  | -0.61 | 0.16  | -0.82 | 0.29  | -0.02 | 0.07  | 0.00  | 0.07  | -0.09 | 0.08  | 0.08 | 0.08  |      |
| <b>GZ-02</b>   |              |        |                                    | 2018/01/19 8:00 to 2018/01/20 8:00 | 3.68 | 2.30  | -0.15 | 0.05  | -0.23 | 0.11  | -0.38 | 0.14  | -0.39 | 0.16  | -0.70 | 0.29  | -0.05 | 0.07  | -0.03 | 0.07  | -0.09 | 0.08 | -0.11 | 0.08 |
| <b>GZ-03</b>   |              |        |                                    | 2018/01/20 8:00 to 2018/01/21 8:00 | 3.51 | 2.23  | -0.19 | 0.05  | -0.35 | 0.11  | -0.51 | 0.14  | -0.65 | 0.16  | -0.92 | 0.29  | -0.03 | 0.07  | -0.03 | 0.07  | -0.02 | 0.08 | 0.04  | 0.08 |
| <b>GZ-04</b>   |              |        |                                    | 2018/01/21 8:00 to 2018/01/22 8:00 | 4.33 | 3.20  | -0.24 | 0.05  | -0.37 | 0.11  | -0.57 | 0.14  | -0.72 | 0.16  | -1.05 | 0.29  | -0.06 | 0.07  | -0.01 | 0.07  | -0.03 | 0.08 | 0.01  | 0.08 |
| <b>GZ-05</b>   |              |        |                                    | 2018/01/22 8:00 to 2018/01/23 8:00 | 3.64 | 5.01  | -0.12 | 0.05  | -0.14 | 0.11  | -0.27 | 0.14  | -0.29 | 0.16  | -0.46 | 0.29  | -0.04 | 0.07  | 0.01  | 0.07  | -0.05 | 0.08 | -0.02 | 0.08 |
| <b>GZ-06</b>   |              |        |                                    | 2018/01/23 8:00 to 2018/01/24 8:00 | 3.41 | 3.03  | -0.07 | 0.05  | -0.07 | 0.11  | -0.12 | 0.14  | -0.11 | 0.16  | -0.29 | 0.29  | -0.05 | 0.07  | -0.01 | 0.07  | -0.03 | 0.08 | -0.12 | 0.08 |
| <b>GZ-07</b>   |              |        |                                    | 2018/01/24 8:00 to 2018/01/25 8:00 | 3.67 | 1.79  | -0.18 | 0.08  | -0.25 | 0.11  | -0.33 | 0.14  | -0.37 | 0.16  | -0.64 | 0.29  | -0.08 | 0.07  | -0.06 | 0.07  | -0.05 | 0.08 | -0.08 | 0.10 |
| <b>GZ-08</b>   |              | Summer |                                    | 2018/06/29 8:00 to 2018/06/30 8:00 | 3.16 | 1.41  | -0.27 | 0.05  | -0.31 | 0.11  | -0.53 | 0.15  | -0.52 | 0.18  | -0.79 | 0.29  | -0.14 | 0.07  | -0.05 | 0.10  | -0.14 | 0.08 | -0.01 | 0.29 |
| <b>GZ-09</b>   |              |        |                                    | 2018/06/30 8:00 to 2018/07/01 8:00 | 3.24 | 1.48  | -0.28 | 0.05  | -0.26 | 0.11  | -0.48 | 0.15  | -0.40 | 0.18  | -0.55 | 0.29  | -0.18 | 0.07  | -0.06 | 0.10  | -0.19 | 0.08 | 0.04  | 0.29 |
| <b>GZ-10</b>   |              |        |                                    | 2018/07/01 8:00 to 2018/07/02 8:00 | 3.05 | 1.54  | -0.20 | 0.05  | -0.20 | 0.11  | -0.33 | 0.14  | -0.36 | 0.16  | -0.59 | 0.29  | -0.11 | 0.07  | -0.02 | 0.07  | -0.06 | 0.08 | -0.06 | 0.24 |
| <b>GZ-11</b>   |              |        |                                    | 2018/07/02 8:00 to 2018/07/03 8:00 | 3.12 | 2.42  | -0.20 | 0.06  | -0.24 | 0.11  | -0.42 | 0.14  | -0.40 | 0.16  | -0.38 | 0.29  | -0.10 | 0.07  | -0.03 | 0.07  | -0.12 | 0.08 | 0.22  | 0.08 |
| <b>GZ-12</b>   |              |        |                                    | 2018/07/03 8:00 to 2018/07/04 8:00 | 3.01 | 2.39  | -0.18 | 0.06  | -0.29 | 0.11  | -0.59 | 0.14  | -0.63 | 0.16  | -0.84 | 0.29  | -0.02 | 0.07  | 0.02  | 0.07  | -0.12 | 0.08 | 0.09  | 0.08 |
| <b>GZ-13</b>   |              |        |                                    | 2018/07/04 8:00 to 2018/07/05 8:00 | 3.35 | 1.52  | -0.24 | 0.05  | -0.34 | 0.11  | -0.47 | 0.14  | -0.51 | 0.16  | -0.81 | 0.29  | -0.11 | 0.07  | -0.08 | 0.07  | -0.09 | 0.08 | -0.05 | 0.24 |
| <b>GZ-14</b>   |              |        |                                    | 2018/07/05 8:00 to 2018/07/06 8:00 | 3.04 | 1.62  | -0.12 | 0.05  | -0.12 | 0.11  | -0.29 | 0.14  | -0.23 | 0.16  | -0.27 | 0.29  | -0.06 | 0.07  | -0.01 | 0.07  | -0.12 | 0.08 | 0.07  | 0.08 |
| <b>MWLG-01</b> | Mt. Waliguan | Winter | 2014/11/19 to 2014/11/29           | 22.6                               | 1.40 | -0.12 | 0.12  | -0.08 | 0.15  | -0.23 | 0.14  | -0.16 | 0.16  | --    | --    | -0.08 | 0.11  | 0.00  | 0.13  | -0.10 | 0.11  | --   | --    |      |
| <b>MWLG-02</b> |              |        |                                    | 2014/11/29 to 2014/12/09           | 20.4 | 1.46  | -0.12 | 0.05  | -0.13 | 0.11  | -0.38 | 0.14  | -0.25 | 0.16  | --    | --    | -0.06 | 0.07  | 0.00  | 0.09  | -0.19 | 0.10 | --    | --   |
| <b>MWLG-03</b> |              |        |                                    | 2014/12/09 to 2014/12/19           | 23.4 | 2.12  | -0.21 | 0.05  | -0.19 | 0.13  | -0.35 | 0.16  | -0.26 | 0.16  | --    | --    | -0.14 | 0.07  | -0.06 | 0.10  | -0.15 | 0.12 | --    | --   |
| <b>MWLG-04</b> |              |        |                                    | 2014/12/19 to 2014/12/29           | 21.3 | 1.95  | -0.29 | 0.05  | -0.33 | 0.11  | -0.55 | 0.14  | -0.49 | 0.16  | --    | --    | -0.17 | 0.07  | -0.08 | 0.07  | -0.19 | 0.08 | --    | --   |
| <b>MWLG-05</b> |              |        |                                    | 2014/12/29 to 2015/01/09           | 22.4 | 2.00  | -0.13 | 0.05  | -0.10 | 0.11  | -0.24 | 0.14  | -0.11 | 0.16  | --    | --    | -0.10 | 0.07  | -0.05 | 0.07  | -0.16 | 0.12 | --    | --   |
| <b>MWLG-06</b> |              |        |                                    | 2015/01/09 to 2015/01/19           | 23.7 | 1.80  | -0.11 | 0.05  | -0.04 | 0.11  | -0.10 | 0.14  | -0.04 | 0.16  | --    | --    | -0.10 | 0.07  | -0.02 | 0.07  | -0.07 | 0.12 | --    | --   |
| <b>MWLG-07</b> |              |        |                                    | 2015/01/19 to 2015/01/29           | 22.4 | 1.95  | -0.04 | 0.10  | 0.02  | 0.11  | 0.00  | 0.26  | 0.07  | 0.16  | --    | --    | -0.06 | 0.07  | -0.02 | 0.07  | -0.06 | 0.19 | --    | --   |
| <b>MWLG-08</b> |              |        |                                    | 2015/01/29 to 2015/02/09           | 20.2 | 2.21  | -0.15 | 0.06  | 0.01  | 0.11  | -0.21 | 0.14  | -0.08 | 0.16  | --    | --    | -0.13 | 0.07  | 0.05  | 0.07  | -0.15 | 0.08 | --    | --   |
| <b>MWLG-09</b> |              |        |                                    | 2015/02/09 to 2015/02/19           | 21.3 | 1.14  | -0.13 | 0.15  | -0.09 | 0.11  | -0.17 | 0.23  | -0.13 | 0.16  | --    | --    | -0.10 | 0.12  | -0.02 | 0.07  | -0.08 | 0.16 | --    | --   |

Table S5 Statistical summary of mean TGM concentrations,  $\delta^{202}\text{Hg}$ ,  $\Delta^{199}\text{Hg}$ ,  $\Delta^{200}\text{Hg}$ , simulated soil-atmosphere  $\text{Hg}^0$  exchange flux in summer, winter and the whole sampling period (Wang et al., 2016), and anthropogenic  $\text{Hg}^0$  emission flux in the investigated cities (AMAP/UNEP, 2013).

| Site         | Season | TGM  |      |    | $\delta^{202}\text{Hg}$ (‰) |      |    | $\Delta^{199}\text{Hg}$ (‰) |      |    | $\Delta^{200}\text{Hg}$ (‰) |      |    | Simulated soil-atmosphere $\text{Hg}^0$ exchange flux<br>( $\text{ng m}^{-2} \text{h}^{-1}$ ) | Anthropogenic $\text{Hg}^0$ emission flux<br>( $\text{ng m}^{-2} \text{h}^{-1}$ ) |
|--------------|--------|------|------|----|-----------------------------|------|----|-----------------------------|------|----|-----------------------------|------|----|-----------------------------------------------------------------------------------------------|-----------------------------------------------------------------------------------|
|              |        | Mean | 1sd  | n  | Mean                        | 1sd  | n  | Mean                        | 1sd  | n  | Mean                        | 1sd  | n  |                                                                                               |                                                                                   |
| Beijing      | Summer | 2.85 | 0.26 | 7  | -0.40                       | 0.12 | 7  | 0.00                        | 0.04 | 7  | 0.02                        | 0.03 | 7  | 10.3                                                                                          |                                                                                   |
|              | Winter | 1.88 | 0.62 | 7  | -0.09                       | 0.24 | 7  | -0.08                       | 0.08 | 7  | -0.05                       | 0.05 | 7  | 1.4                                                                                           |                                                                                   |
|              | Mean   | 2.37 | 0.68 | 15 | -0.24                       | 0.24 | 15 | -0.04                       | 0.07 | 15 | -0.01                       | 0.05 | 15 | 5.9                                                                                           | 30.1                                                                              |
| Shijiazhuang | Summer | 3.34 | 0.87 | 7  | -0.83                       | 0.22 | 7  | -0.07                       | 0.05 | 7  | -0.02                       | 0.03 | 7  | 10.0                                                                                          |                                                                                   |
|              | Winter | 1.94 | 0.67 | 6  | -0.25                       | 0.43 | 6  | -0.17                       | 0.04 | 6  | -0.02                       | 0.05 | 6  | 0.8                                                                                           |                                                                                   |
|              | Mean   | 2.64 | 1.04 | 13 | -0.54                       | 0.44 | 13 | -0.12                       | 0.07 | 13 | -0.02                       | 0.04 | 13 | 5.4                                                                                           | 12.1                                                                              |
| Jinan        | Summer | 3.14 | 0.59 | 7  | -0.79                       | 0.29 | 7  | -0.07                       | 0.03 | 7  | -0.01                       | 0.02 | 7  | 11.9                                                                                          |                                                                                   |
|              | Winter | 1.96 | 1.00 | 4  | -0.21                       | 0.37 | 4  | -0.14                       | 0.02 | 4  | -0.02                       | 0.04 | 4  | 1.1                                                                                           |                                                                                   |
|              | Mean   | 2.55 | 0.93 | 11 | -0.50                       | 0.42 | 11 | -0.10                       | 0.04 | 11 | -0.02                       | 0.03 | 11 | 6.5                                                                                           | 36.2                                                                              |
| Lanzhou      | Summer | 3.08 | 0.70 | 7  | -0.92                       | 0.32 | 7  | -0.03                       | 0.05 | 7  | -0.04                       | 0.06 | 7  | 8.5                                                                                           |                                                                                   |
|              | Winter | 2.41 | 0.46 | 5  | -0.48                       | 0.19 | 5  | -0.08                       | 0.05 | 5  | -0.01                       | 0.03 | 5  | 1.4                                                                                           |                                                                                   |
|              | Mean   | 2.74 | 0.70 | 12 | -0.70                       | 0.35 | 12 | -0.06                       | 0.05 | 12 | -0.03                       | 0.05 | 12 | 4.9                                                                                           | 60.4                                                                              |
| Zhengzhou    | Summer | 3.71 | 1.33 | 6  | -0.65                       | 0.13 | 6  | -0.04                       | 0.04 | 6  | 0.04                        | 0.05 | 6  | 9.1                                                                                           |                                                                                   |
|              | Winter | 2.99 | 0.62 | 8  | -0.45                       | 0.29 | 8  | -0.08                       | 0.05 | 8  | 0.01                        | 0.03 | 8  | -0.6                                                                                          |                                                                                   |
|              | Mean   | 3.35 | 0.89 | 14 | -0.55                       | 0.24 | 14 | -0.06                       | 0.05 | 14 | 0.02                        | 0.04 | 14 | 4.2                                                                                           | 20.1                                                                              |
| Shanghai     | Summer | 2.55 | 0.50 | 7  | -0.57                       | 0.19 | 7  | -0.03                       | 0.04 | 7  | 0.03                        | 0.03 | 7  | 5.4                                                                                           |                                                                                   |
|              | Winter | 2.12 | 0.68 | 6  | -0.07                       | 0.30 | 6  | -0.11                       | 0.06 | 6  | -0.06                       | 0.04 | 6  | 1.7                                                                                           |                                                                                   |
|              | Mean   | 2.34 | 0.61 | 13 | -0.32                       | 0.35 | 13 | -0.07                       | 0.06 | 13 | -0.01                       | 0.06 | 13 | 3.5                                                                                           | 177                                                                               |
| Chengdu      | Summer | 4.66 | 1.07 | 7  | -0.91                       | 0.11 | 7  | -0.01                       | 0.03 | 7  | 0.01                        | 0.03 | 7  | 8.1                                                                                           |                                                                                   |

|                     |        |      |      |    |       |      |    |       |      |    |       |      |    |      |      |
|---------------------|--------|------|------|----|-------|------|----|-------|------|----|-------|------|----|------|------|
|                     | Winter | 4.45 | 1.40 | 7  | -0.45 | 0.52 | 7  | -0.01 | 0.04 | 7  | 0.00  | 0.03 | 7  | 3.3  |      |
|                     | Mean   | 4.56 | 1.21 | 14 | -0.68 | 0.44 | 14 | -0.01 | 0.03 | 14 | 0.00  | 0.03 | 14 | 5.7  | 37.6 |
| <b>Wuhan</b>        | Summer | 4.00 | 0.63 | 9  | -0.77 | 0.22 | 9  | -0.02 | 0.04 | 9  | 0.00  | 0.02 | 9  | 3.9  |      |
|                     | Winter | 3.53 | 1.75 | 7  | -0.59 | 0.22 | 6  | -0.09 | 0.04 | 6  | -0.03 | 0.07 | 6  | 0.9  |      |
|                     | Mean   | 3.76 | 1.22 | 16 | -0.68 | 0.23 | 15 | -0.05 | 0.05 | 15 | -0.02 | 0.05 | 15 | 2.4  | 41.9 |
| <b>Guiyang</b>      | Summer | 2.43 | 0.31 | 7  | -1.02 | 0.20 | 6  | -0.05 | 0.04 | 6  | 0.00  | 0.03 | 6  | 15.5 |      |
|                     | Winter | 5.58 | 1.97 | 7  | -0.90 | 0.56 | 7  | 0.03  | 0.04 | 7  | 0.01  | 0.01 | 7  | 8.9  |      |
|                     | Mean   | 4.01 | 2.14 | 14 | -0.96 | 0.42 | 13 | -0.01 | 0.06 | 13 | 0.01  | 0.02 | 13 | 12.2 | 11.7 |
| <b>Guangzhou</b>    | Summer | 1.77 | 0.44 | 7  | -0.43 | 0.13 | 7  | -0.10 | 0.05 | 7  | -0.03 | 0.04 | 7  | 12.5 |      |
|                     | Winter | 3.15 | 1.21 | 7  | -0.45 | 0.22 | 7  | -0.05 | 0.02 | 7  | -0.02 | 0.02 | 7  | 7.3  |      |
|                     | Mean   | 2.46 | 1.13 | 14 | -0.44 | 0.17 | 14 | -0.07 | 0.05 | 14 | -0.03 | 0.03 | 14 | 9.9  | 56.7 |
| <b>Mt. Waliguan</b> | Mean   | 1.78 | 0.36 | 9  | -0.16 | 0.16 | 9  | -0.10 | 0.04 | 9  | -0.02 | 0.04 | 9  |      |      |

Table S6 Monthly productions of cement, zinc, iron and steel, lead, and aluminum during winter, summer, and the all year of 2018 as well as the estimated monthly Hg emissions for the production of these source materials. Note that Hg emissions from the production of these source materials as well as from coal combustion accounted for 90% of the total anthropogenic Hg emissions in China (Liu et al., 2019).

| Season         | Source material production <sup>a</sup>  |                                        |                                                     |                                        |                                            | Hg emission (Mg/month) |                  |                      |                  |                  |                   |
|----------------|------------------------------------------|----------------------------------------|-----------------------------------------------------|----------------------------------------|--------------------------------------------|------------------------|------------------|----------------------|------------------|------------------|-------------------|
|                | Cement<br>(10 <sup>4</sup><br>ton/month) | Zinc<br>(10 <sup>4</sup><br>ton/month) | Iron and<br>steel<br>(10 <sup>4</sup><br>ton/month) | Lead<br>(10 <sup>4</sup><br>ton/month) | Aluminum<br>(10 <sup>4</sup><br>ton/month) | Cement                 | Zinc             | Iron<br>and<br>steel | Lead             | Aluminum         | Total             |
| Winter<br>2018 | 14970                                    | 55.5                                   | 8910                                                | 45.9                                   | 465                                        | 8.9                    | 3.7              | 2.6                  | 2.4              | 1.1              | 18.6              |
| Summer<br>2018 | 19440                                    | 43.8                                   | 9390                                                | 39.9                                   | 423                                        | 11.5                   | 2.9              | 2.7                  | 2.1              | 1.1              | 20.1              |
| Year<br>2018   | 17880                                    | 46.8                                   | 9090                                                | 42.0                                   | 432                                        | 10.6 <sup>b</sup>      | 3.1 <sub>b</sub> | 2.6 <sub>b</sub>     | 2.2 <sup>b</sup> | 1.1 <sup>b</sup> | 19.8 <sub>b</sub> |

a): data are from National Bureau of Statistics, China

b): data are from Liu et al.(2019).

Reference:

- AMAP/UNEP: Geospatially distributed mercury emissions dataset 2010v1, in, 2013.
- Blum, J. D., and Johnson, M. W.: Recent Developments in Mercury Stable Isotope Analysis, *Reviews in Mineralogy & Geochemistry*, 82, 733-757, 2017.
- Duan, L., Wang, X. H., Wang, D. F., Duan, Y. S., Cheng, N., and Xiu, G. L.: Atmospheric mercury speciation in Shanghai, China, *Sci Total Environ*, 578, 460-468, 2017.
- Estrade, N., Carignan, J., Sonke, J. E., and Donard, O. F. X.: Measuring Hg Isotopes in Bio-Geo-Environmental Reference Materials, *Geostand Geoanal Res*, 34, 79-93, 2010.
- Fu, X. W., Feng, X. B., Qiu, G. L., Shang, L. H., and Zhang, H.: Speciated atmospheric mercury and its potential source in Guiyang, China, *Atmos Environ*, 45, 4205-4212, DOI 10.1016/j.atmosenv.2011.05.012, 2011.
- Fu, X. W., Heimburger, L. E., and Sonke, J. E.: Collection of atmospheric gaseous mercury for stable isotope analysis using iodine- and chlorine-impregnated activated carbon traps, *J Anal Atom Spectrom*, 29, 841-852, Doi 10.1039/C3ja50356a, 2014.
- Gustin, M. S., Dunham-Cheatham, S. M., and Zhang, L.: Comparison of 4 Methods for Measurement of Reactive, Gaseous Oxidized, and Particulate Bound Mercury, *Environmental Science & Technology*, 53, 14489-14495, 10.1021/acs.est.9b04648, 2019.
- Liu, K. Y., Wu, Q. R., Wang, L., Wang, S. X., Liu, T. H., Ding, D., Tang, Y., Li, G. L., Tian, H. Z., Duan, L., Wang, X., Fu, X. W., Feng, X. B., and Hao, J. M.: Measure-Specific Effectiveness of Air Pollution Control on China's Atmospheric Mercury Concentration and Deposition during 2013-2017, *Environmental Science & Technology*, 53, 8938-8946, 10.1021/acs.est.9b02428, 2019.
- Sun, G., Sommar, J., Feng, X., Lin, C.-J., Ge, M., Wang, W., Yin, R., Fu, X., and Shang, L.: Mass-dependent and -independent fractionation of mercury isotope during gas-phase oxidation of elemental mercury vapor by atomic Cl and Br, *Environmental Science & Technology*, 50, 9232-9241, 10.1021/acs.est.6b01668, 2016.
- Wang, X., Lin, C. J., Yuan, W., Sommar, J., Zhu, W., and Feng, X. B.: Emission-dominated gas exchange of elemental mercury vapor over natural surfaces in China, *Atmos Chem Phys*, 16, 11125-11143, 2016.
- Zhang, H., Wang, Z. W., Wang, C. J., and Zhang, X. S.: Concentrations and gas-particle partitioning of atmospheric reactive mercury at an urban site in Beijing, China, *Environ Pollut*, 249, 13-23, 10.1016/j.envpol.2019.02.064, 2019.
